# Supplementary material for: Agreement between routine and research measurement of infant height and weight
Source: PubMed Central journal article supplement — Arch Dis Child. 2014 Sep 29;100(1):24–9. doi: 10.1136/archdischild-2014-305970 (PMC4283671; doi:10.1136/archdischild-2014-305970), 2014-09-29
Supplement: archdischild-2014-305970-s1.pdf [file archdischild-2014-305970-s1.pdf]

**Supplementary Table 1.** Multivariable linear regression coefficients (Coef) with 95% confidence intervals (95% CI) for potential predictors of differences in height measurements (predicted BiB1000 height – predicted PCHR height)

| HEIGHT                          | 6 months            |         | 12 months           |         | 24 months           |         |
|---------------------------------|---------------------|---------|---------------------|---------|---------------------|---------|
|                                 | Coef (95% CI)       | p value | Coef (95% CI)       | p value | Coef (95% CI)       | p value |
| Mean height (z-score)           | 0.54 (0.18, 0.89)   | 0.003   | -0.39 (-0.86, 0.08) | 0.11    | 0.05 (-0.37, 0.54)  | 0.74    |
| Mean weight (z-score)           | -0.40 (-0.82, 0.03) | 0.06    | 0.17(-0.36, 0.70)   | 0.54    | 0.02 (-0.28, 0.31)  | 0.90    |
| <b>Ethnicity</b>                |                     |         |                     |         |                     |         |
| White British (reference)       | 0                   |         | 0                   |         | 0                   |         |
| Pakistani                       | 0.83 (0.09,1.57)    | 0.03    | 0.65 (-0.26, 1.56)  | 0.16    | -0.08 (-0.37, 0.54) | 0.72    |
| Other                           | -0.34 (-1.48, 0.80) | 0.55    | -0.15 (-1.38, 1.09) | 0.82    | -0.28 (-0.98, 0.43) | 0.44    |
| <b>Maternal education</b>       |                     |         |                     |         |                     |         |
| <5 GCSEs                        | 0.18 (-0.75, 1.11)  | 0.70    | -0.08 (-1.17, 1.00) | 0.88    | 0.14 (-0.48, 0.76)  | 0.66    |
| ≥5 GCSEs (reference)            | 0                   |         | 0                   |         | 0                   |         |
| A level                         | -0.19 (-1.25, 0.87) | 0.72    | -0.10 (-1.22, 1.02) | 0.86    | 0.19 (-0.48, 0.76)  | 0.59    |
| Degree                          | -0.13 (-0.98, 0.73) | 0.77    | 0.10 (-0.97, 1.17)  | 0.86    | -0.04 (-0.57, 0.50) | 0.73    |
| Other                           | 0.43 (-1.04, 1.90)  | 0.44    | -0.36 (-2.04, 1.33) | 0.68    | 0.88 (0.07, 1.84)   | 0.07    |
| <b>Baby's sex</b>               |                     |         |                     |         |                     |         |
| Male (reference)                | 0                   |         | 0                   |         | 0                   |         |
| Female                          | -0.26 (-0.93, 0.41) | 0.44    | 0.25 (-0.55, 1.05)  | 0.54    | 0.05 (-0.38, 0.48)  | 0.81    |
| <b>Gestation</b>                |                     |         |                     |         |                     |         |
| ≥37 weeks (reference)           | 0                   |         | 0                   |         | 0                   |         |
| <37 weeks                       | -1.38 (-3.37, 0.62) | 0.17    | 0.53 (-2.20, 3.09)  | 0.68    | -0.03 (-1.26, 1.20) | 0.96    |
| <b>Birth weight</b>             |                     |         |                     |         |                     |         |
| ≥2.5kg (reference)              | 0                   |         | 0                   |         | 0                   |         |
| <2.5kg                          | -0.13 (-1.93, 1.67) | 0.89    | 0.32 (-1.64, 2.28)  | 0.75    | -0.84 (-1.97, 0.28) | 0.14    |
| <b>Sigma Coefficients (log)</b> |                     |         |                     |         |                     |         |
| Diff in z-scores for length     | 0.22                | 0.19    | -0.47               | 0.005   | -0.02               | 0.85    |
| Diff in z-scores for weight     | -0.10               | 0.086   | 0.003               | 0.97    | 0.02                | 0.77    |

**Multivariable linear regression coefficients (Coef) with 95% confidence intervals (95% CI) for potential predictors of differences in weight measurements  
(predicted BiB1000 weight – predicted PCHR weight)**

| WEIGHT                          | 6 months             |         | 12 months            |         | 24 months           |         |
|---------------------------------|----------------------|---------|----------------------|---------|---------------------|---------|
|                                 | Coef (95% CI)        | p value | Coef (95% CI)        | p value | Coef (95% CI)       | p value |
| Mean height (z-score)           | 0.02 (-0.02, 0.06)   | 0.42    | 0.005 (-0.05, 0.06)  | 0.87    | 0.01 (-0.07, 0.10)  | 0.62    |
| Mean weight (z-score)           | -0.02 (-0.07, 0.03)  | 0.41    | 0.05 (-0.02, 0.11)   | 0.15    | -0.02 (-0.11, 0.06) | 0.75    |
| <b>Ethnicity</b>                |                      |         |                      |         |                     |         |
| White British (reference)       | 0                    |         | 0                    |         | 0                   |         |
| Pakistani                       | -0.09 (-0.18, 0.00)  | 0.051   | 0.06 (-0.05, 0.18)   | 0.30    | -0.09 (-0.22, 0.04) | 0.16    |
| Other                           | -0.05 (-0.19, 0.08)  | 0.43    | 0.13 (-0.02, 0.28)   | 0.09    | 0.02 (-0.27, 0.11)  | 0.42    |
| <b>Maternal education</b>       |                      |         |                      |         |                     |         |
| <5 GCSEs                        | -0.07 (-0.18, 0.04)  | 0.23    | -0.04 (-0.17, -0.09) | 0.53    | -0.02 (-0.15, 0.20) | 0.78    |
| ≥5 GCSEs (reference)            | 0                    |         | 0                    |         | 0                   |         |
| A level                         | -0.03 (-0.16, 0.10)  | 0.61    | -0.18 (-0.31, -0.04) | 0.014   | -0.02 (-0.21, 0.16) | 0.80    |
| Degree                          | -0.10 (-0.20, 0.01)  | 0.69    | -0.11 (-0.24, 0.02)  | 0.09    | -0.07 (-0.22, 0.08) | 0.34    |
| Other                           | -0.11 (-0.28, 0.07)  | 0.22    | -0.14 (-0.36, 0.07)  | 0.18    | 0.17 (-0.10, 0.44)  | 0.21    |
| <b>Baby's sex</b>               |                      |         |                      |         |                     |         |
| Male (reference)                | 0                    |         | 0                    |         | 0                   |         |
| Female                          | 0.06 (-0.02, 0.14)   | 0.15    | -0.02 (-0.12, 0.08)  | 0.73    | 0.06 (-0.06, 0.17)  | 0.36    |
| <b>Gestation</b>                |                      |         |                      |         |                     |         |
| ≥37 weeks (reference)           | 0                    |         | 0                    |         | 0                   |         |
| <37 weeks                       | -0.82 (-1.01, -0.64) | <0.0001 | 0.64 (0.36, 0.93)    | <0.001  | -0.02 (-0.36, 0.32) | 0.90    |
| <b>Birth weight</b>             |                      |         |                      |         |                     |         |
| ≥2.5kg (reference)              | 0                    |         | 0                    |         | 0                   |         |
| <2.5kg                          | 0.32 (0.12, 0.53)    | 0.002   | 0.07 (-0.18, 0.33)   | 0.57    | -0.24 (-0.55, 0.06) | 0.12    |
| <b>Sigma Coefficients (log)</b> |                      |         |                      |         |                     |         |
| Diff in z-scores for length     | 0.48                 | 0.005   | -0.47                | 0.005   | -0.18               | 0.11    |
| Diff in z-scores for weight     | 0.03                 | 0.59    | 0.003                | 0.97    | 0.23                | 0.0001  |
